# Supplementary material for: SAETTA: high resolution 3D mapping of the total lightning activityin the Mediterranean basin over Corsica, with a focus on a MCSevent
Source: Copernicus journal article supplement (doi:10.5194/amt-2019-192), 2019-05-17
Supplement: Supplementary file [file amt-2019-192-RC3-supplement.zip]

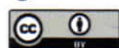

Due July 12

## SAETTA: high resolution 3D mapping of the total lightning activity in the Mediterranean basin over Corsica, with a focus on a MCS event

Sylvain Coquillat<sup>1</sup>, Eric Defer<sup>1</sup>, Pierre de Guibert<sup>1</sup>, Dominique Lambert<sup>1</sup>, Jean-Pierre Pinty<sup>1</sup>, Véronique Pont<sup>1</sup>, Serge Prieur<sup>1</sup>, Ronald J. Thomas<sup>2</sup>, Paul R. Krehbiel<sup>2</sup>, William Rison<sup>2</sup>

<sup>1</sup>Laboratoire d'Aérodologie, Université Toulouse 3 Paul Sabatier, CNRS, Toulouse, France

<sup>2</sup>Langmuir Laboratory for Atmospheric Research, New Mexico Tech, Socorro, New Mexico, USA

Correspondence to: Sylvain Coquillat ([sylvain.coquillat@aero.obs-mip.fr](mailto:sylvain.coquillat@aero.obs-mip.fr))

**Abstract.** Deployed in the mountainous island of Corsica for thunderstorm monitoring purpose in the Mediterranean Basin, SAETTA is a network of 12 LMA stations (Lightning Mapping Array, designed by New Mexico Tech, USA) that allows the 3-D mapping of VHF radiations emitted by cloud discharges in the 60-66 MHz band. It works at high temporal (80  $\mu$ s) and spatial (tens of meters at best) resolutions within a range of about 350 km. Originally deployed in May 2014, SAETTA was commissioned during the summer and fall seasons and is now permanently operational since April 2016 until at least the end of 2020. We first evaluate the performances of SAETTA through the radial, azimuthal, and altitude errors of VHF sources localization with the theoretical model of Thomas et al. (2004). We also compute on a 240 km  $\times$  240 km domain the minimum altitude at which a VHF source can be detected by at least 6 stations by taking into account the mask effect of the relief. We then report the 3-year observations on the same domain in terms of number of lightning days per square kilometer and in terms of lightning days integrated on the whole domain. The lightning activity is first maximum in June because of daytime convection driven by solar energy input, but concentrates on a specific hot spot in July just above the crossroad of the three main valleys. This hot spot is probably due to the low-level convergence of moist air fluxes from sea breezes channeled by the three valleys. Lightning activity increases again in September due to numerous small thunderstorms above the sea and to some high precipitating events. Finally we report lightning observations of unusual high altitude discharges associated with the mesoscale convective system of June 8, 2015. Most of them are small discharges on top of an intense convective core during convective surges. They are considered in the flash classification of Thomas et al. (2003) as small-isolated and short-isolated flashes. The other high altitude discharges, much less numerous, are long range flashes that develop through the stratiform region and suddenly undergo upward propagations towards an uppermost thin layer of charge. This observation supports the recent conceptual model of Dye and Bansemer (2019) that explains such upper level layer of charge in the stratiform region by the development of a non-riming ice collisional charging in a mesoscale updraft.

not the resolution which is ~ 40 ns

over-stated

"This observation could be consistent with the recent, ..."

confirm



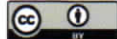

## 1 Introduction

Lightning is a multiscale phenomenon that occurs at the end of a chain of dynamical and microphysical processes that act throughout the formation and the lifetime of a thunderstorm cloud. The key processes are low level convergence of moist air, convection, liquid and solid condensation of water vapor, latent heat release, interactions between cloud particles, precipitation, and cloud electrification. Lightning acts as a relaxation of the electric field resulting from the cloud electrification due to microphysical interactions by the non inductive charging process during graupel - ice crystals collisions (see Saunders, 2008). It can therefore be considered as a bulk tracer of the intense convection, or as a proxy of each of the cloud processes mentioned above provided it is observed at high spatial and time resolutions.

Various lightning detection systems are used so far in operational mode or for scientific research purpose. Most of them are designed to detect the electromagnetic field radiated by lightning in the LF/ VLF range. Those ones (e.g. Euclid-Météorage, ATDnet, ZEUS in Europe; NLDN in USA; or WWLLN worldwide) can localize at rather long range the ground impact of the return stroke that is the most powerful phase of a cloud-to-ground lightning flash (CG), or 2D localize intracloud discharges. They do not provide yet comprehensive information on the thundercell by which they are produced. On another hand, some detection systems such as the LMA (Lightning Mapping Array of the New Mexico Tech, see Thomas et al., 2004) are designed to observe lightning in the VHF range, which allows detecting the lightning leader phases and mapping the whole lightning inside the cloud. This provides information on lightning closely linked with the microphysical structure of the cloud in which the discharges propagate.

In the frame of the HyMeX program (Ducrocq et al., 2014), which aims at documenting the water cycle in the Mediterranean basin that is considered as a climatic hot spot (Giorgi, 2006), we plan to monitor the convection for addressing the question about the evolution of highly precipitating events and deep convection in response to the climatic change. For this purpose, the Collectivité Territoriale de Corse - via the PCOA (CORSiCA Atmospheric Observations Platform, <https://corsica.obs-mip.fr/>) - gave us the opportunity to equip the Corsica Island with a LMA instrument that is considered as a reference for the accurate detection of total lightning activity. The instrument is called SAETTA, which name is the acronym of "Suivi de l'Activité Electrique Tridimensionnelle Totale de l'Atmosphère" (Monitoring of the Total Tridimensional Electrical Activity of the Atmosphere) that means "lightning" in Corsican language. In combination with the CG observation of Météorage (the French part of the Euclid network), this setup provides a comprehensive description of the total lightning activity.

As a matter of fact, Corsica has a complex and tortuous relief, with mountainous massifs made up of more than a hundred summits culminating at more than 2000 meters of altitude, located only a few kilometers from the coasts. So much so that it is often described as "a mountain in the sea". Another important aspect is the upwind sea surface evaporation forced by synoptic flows (Adler et al., 2015; Scheffknecht et al, 2016). These characteristic features of mountainous island explain the

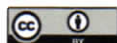

torrential nature of the rivers of Corsica. The climatic particularities related to its geographical position combined with its specific relief generate very violent precipitations which can spread over time, generating torrential floods especially in autumn (Lambert and Argence, 2008; Scheffknecht et al., 2016; Scheffknecht et al., 2017). The deployment of the LMA in this area will allow us to address scientific issues related to stormy convection in a complex maritime and mountain environment, where fine scale processes make its forecast trickier. Sea, valley and slope breezes are expected to play a key part in the triggering of convection (Barthlott and Kirshbaum, 2013; Tidiga et al., 2018), the influence of synoptic fluxes on these local dynamical features can even complicate the whole (Ducrocq et al., 2008); meanwhile low level fluxes are continuously carrying humidity from the surrounding sea (Adler et al., 2015).

(?)  
mid- and upper-level

10 The deployment of SAETTA in Corsica took place in May 2014. SAETTA functioned operationally from July to October in 2014, from April to December in 2015, and has been in permanent operation since April 2016 until at least the end of 2020. It is planned to operate well beyond in order to obtain long-term observations for issues related to climatic trends. So far, SAETTA has documented lightning activity from the regional scale to the flash scale, providing a relatively well-marked monthly climatology, but also specific observations of lightning of all types - including original flashes showing a jump  
 15 towards the top of the cloud in its trailing stratiform region - and even inverted dipolar structures.

clarify

In the following, we first present the SAETTA network and its performances in Section 2, then describe the overall observations performed from 2014 to 2016 in Section 3, bring an insight on specific and original events detected so far at storm and lightning scales in Section 4, and discuss the perspective of such an instrument with respect to the scientific questions addressed and to the operational needs for ground based and space-born lightning observations.

## 2 The SAETTA Network

The SAETTA network consists of 12 LMA stations (Lightning Mapping Array, developed by New Mexico Tech, USA), which allow mapping lightning flashes in 3 dimensions in real time, at high temporal and spatial resolutions, within a range of about 350 km centered on Corsica. Actually each station independently detects - in the 60-66 MHz bandwidth - the impulsive radio frequency radiations produced by the leader phase of lightning flashes, and accurately measure the time of arrival of the signals thanks to an accurate time base provided by a GPS receiver. Hence, a leader segment - so-called VHF source hereafter - that emits an impulsive radiation from the position  $(x, y, z)$  and at the time  $t$  detected by at least 4 stations of the network can be fairly accurately located and dated using the Time Of Arrival (TOA) technique (see Appendix A in Thomas et al., 2004). As a matter of fact, a minimum of 6 stations is required in the data processing although only 4 unknowns  $(x, y, z, t)$  are to be determined for each VHF source. This consideration of redundant measurements is useful for checking the solution's validity.

5  
^



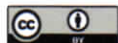

✓ (X) "one key" - there are others!  
 (ask last 3 co-authors)

The primary advantage of a 12-station network is that more VHF sources can be located during a given discharges because 2 different sets of 6 stations can detect sources in the same time window. Nevertheless, during high flash rate period or during spread and very active events each lightning is logically less well sampled since sources emitted by numerous different lightnings compete to be detected by the 2 sets of 6 stations in the same time windows.

5

RMS (?)

A comprehensive description of the operation of LMA stations is available in Appendix A of Thomas et al. (2004). As in all LMA systems, each SAETTA station is configured to record on internal disk the amplitude and the arrival time of the strongest radiation event - above an adjusted detection threshold - which it detects and digitizes in each time window of 80  $\mu$ s. The accurate time of arrival is obtained thanks to a GPS receiver device, with an accuracy of about 40 ns. The data is collected on site at each station by changing the internal disks, which are brought back to the Laboratoire d'Aérodologie in Toulouse (France) to implement the calculation of the 3D position of the VHF sources. In addition, each station is connected by wireless communication links via a modem and a GSM antenna in order to (i) monitor and control the station operation by displaying a large amount of information (e. g. the detection threshold, the filling rate of the internal disk, the battery voltage, the load current from the solar panel...), and (ii) to send decimated data in real time (temporal resolution degraded to 400  $\mu$ s and with higher detection threshold) to a central calculator for real-time processing and display, with about 1 minute of delay ([http://lma.aero.obs-mip.fr/temps\\_reel.html](http://lma.aero.obs-mip.fr/temps_reel.html)). During specific periods such as a measurement campaign, the temporal resolution of the recorded data can be reduced to 10  $\mu$ s and the detection threshold of the decimated data sent by telephony can be reduced to zero, both remotely. The main advantage of reducing the time window is to allow detecting more VHF sources during fast lightning processes like, for example, dart leaders that typically last only a few hundred microseconds and therefore are not well sampled with an 80  $\mu$ s time window.

thv =  $\phi$   
 (?)

## 2.1 Location of the SAETTA stations

? unique to SAETTA?

The 12 SAETTA stations spread over an area about 70 km in West-East direction and about 180 km in South-North direction (see Fig. 1). The distances between two stations vary from 20.7 km to 180.8 km, with an average value of 67.3 km. This geographic configuration is the first specificity of the SAETTA network compared to other LMA networks, i. e. SAETTA is a relatively large network for an almost same number of stations. By comparison, the New Mexico Tech LMA network (see Thomas et al., 2004) is constituted of 13 stations with a minimum distance between them of about 12 km, a maximum of about 76 km and an average of 36 km, which are approximately half of SAETTA characteristics.

Actually, this configuration dates back to 2016. In the previous two years 2014 and 2015, the stations now located in Ersu and in Pertusato (the northern and southern ends of the network, respectively), were located in Foce di Bilia on a hill 35 km north-west of Pertusato station, and in Pinarellu on the roof of the Genoese tower of Pinarellu Island, 27 km south-east of Coscione station. This change was made because the former sites had not been entirely satisfactory in terms of noise level and functionality. In this previous configuration, the distances between two stations varied from 20.7 km to 118.0 km, with

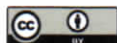

an average value of 59.8 km. Thus, the new configuration has led to an extension of the network in the South-North direction.

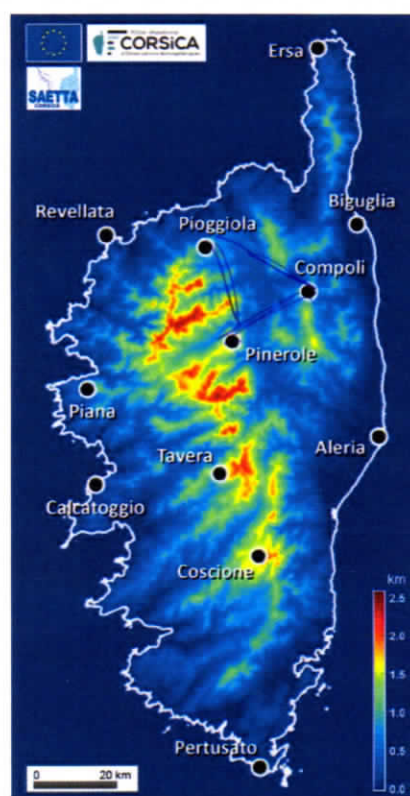

Figure 1: Map of Corsica Island with the location of the 12 SAETTA stations since 2016

The stations are located on sites as remote as possible from any electromagnetic pollution, with the widest possible field of view of the sky (LMA is line-of-sight, so only detects sources above the horizon), and with proper access to the GSM mobile phone network. The choice of sites had to face two challenges: (i) put as many stations aloft to maximize the power of detection by avoiding any mask effect by the relief, and (ii) find accessible sites, these two objectives being most often antithetical. Basically 5 stations are located on the summit of relatively high mountains along the main south-north dorsal ridge; the rest is installed on the outskirts of Corsica, more or less close to the sea in relatively high and unobstructed places. This configuration makes it possible to detect VHF sources at low altitude by at least 6 stations on either side of the central mountain range of the island. It nevertheless has a disadvantage in winter conditions since the altitude stations can be covered with snow and automatically put into hibernation during this period.



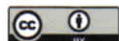

*unique configuration*

Consequently, the SAETTA network has this other specificity: the altitude range of the SAETTA stations (see Table 1) is much wider than that of most other networks, particularly in the USA. The gap between the maximum and the minimum altitudes reaches 1946.4 m high. By comparison, the equivalent gap is less than about 520 m for the Oklahoma LMA; less than about 460 m for the New Mexico Tech LMA used during the STEPS campaign in Colorado and Arkansas; and equal to 335.4 m for the North Alabama LMA (see Koshack et al., 2004). The SAETTA configuration possesses thus a significant vertical baseline. According to Thomas et al (2004) and Koshak et al. (2004), this characteristic is expected allow a better determination of the VHF sources altitude for distant source. This point is addressed here after in the section 2.3.

| Site    | Site name     | Altitude AMSL (m) |              |
|---------|---------------|-------------------|--------------|
|         |               | 2014 – 2015       | 2016 – today |
| A       | Biguglia      | 3.8               | 3.8          |
| B       | Aleria        | 36.4              | 36.4         |
| C       | Pioggiola     | 1281.4            | 1281.4       |
| D       | Revellata     | 162.0             |              |
| E       | Calcatoggio   | 346.2             | 346.2        |
| F       | Foce di Bilia | 551.4             |              |
| G       | Piana         | 823.2             | 823.2        |
| H       | Tavera        | 1648.2            | 1648.2       |
| I       | Compoli       | 1237.9            | 1237.9       |
| J       | Pinerole      | 1950.2            | 1950.2       |
| K       | Coscione      | 1746.8            | 1746.8       |
| L       | Pinarellu     | 65.3              |              |
| M       | Pertusato     |                   | 104.1        |
| N       | Ersa          |                   | 357.5        |
| O       | Revellata     |                   | 167.2        |
| Gap (m) |               | 1946.4            | 1946.4       |

Table 1. Altitude AMSL (m) of the 12 SAETTA stations during the first period from 2014 to 2015 (third column) and since 2016 when 3 stations were moved (forth column). The gap is the difference in altitude between the highest and the lowest stations.

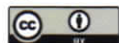

## 2.2 Geometric capability of VHF sources detection by SAETTA

In order to give an idea of the capability of VHF sources detection by SAETTA, the minimum altitude at which a VHF source can be directly seen by at least 6 SAETTA stations was computed, with the complete network on one hand, and with the 3 highest altitude stations off (because of snow cover in winter conditions) on the other hand. The details of the calculation, which takes into account the roundness of the Earth, are presented in Appendix A. The results are displayed as maps in Fig. 2. The considered domain is  $240 \text{ km} \times 240 \text{ km}$  centered on the Pinerole station, which is the highest of the network (1950 m). This domain corresponds to the field of better detection accuracy by SAETTA (see Section 2.3). The chosen horizontal (5 km) and the vertical (500 m) resolutions are rather weak because the calculations are very time-consuming, but the maps give a good idea of the SAETTA detection capability. Most of the VHF sources can be detected above about 1 km or less on the west and east sides of the island, above 2 to 3 km over and north of Corsica, and only above 4 to 5 km beyond 100 km from the center of the island in 7 sectors in the south and south-east of Corsica. In winter conditions, the detection capability deteriorates significantly especially in the South-West where it is impossible to detect sources below 7-8 km. Anywhere else, 5 km seems to be a minimum average altitude in winter, except in the NW and NE corners of the sea domain where low levels can still be scrutinized. For longer range observation up to about 350 km from the center of the network, see section 3.1.

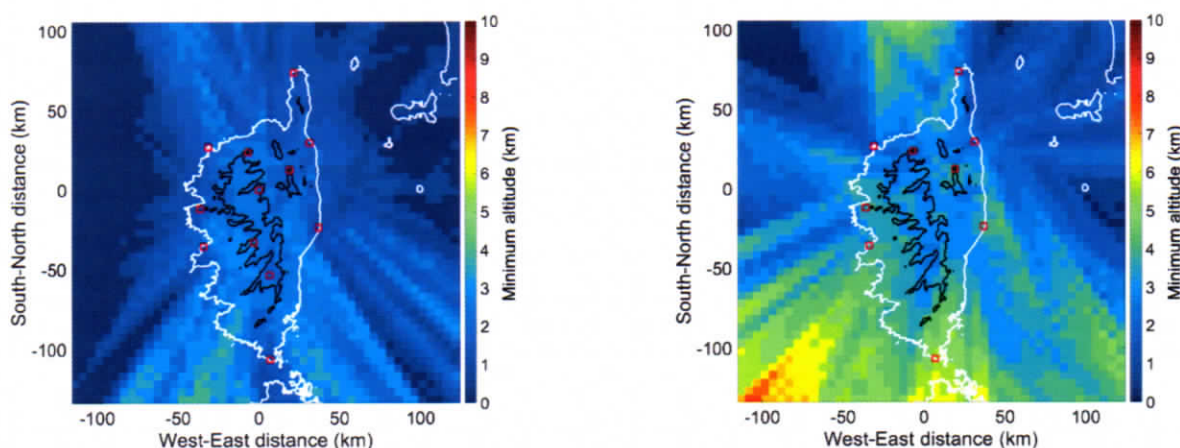

Figure 2: Capability of VHF sources detection by the SAETTA network in the  $240 \text{ km} \times 240 \text{ km}$  domain of better detection accuracy centered on Corsica: minimum altitude of direct vision by at least 6 stations of the network. Left: full network with 12 stations (red squares). Right: network with the 3 highest stations off (e. g. because of stations wintering). Isocontours at 1000 m altitude are indicated by black lines. Horizontal resolution: 5 km; vertical resolution: 500 m.



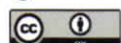

*Location (or Position) ?*

## 2.3 Accuracy of the SAETTA network

With regard to the uncertainty of localization of VHF sources by the SAETTA network, reference can be made to the article by Thomas et al. (2004) who evaluated both theoretically and experimentally the location accuracy of the LMA used during the STEPS 2000 experiment (Lang et al., 2004). They found that short-duration pulses emitted by a VHF transmitter carried by a sounding balloon between 6 and 12 km altitude over the central part of the network were located with an accuracy of about 6-12 m in horizontal position and about 20-30 m in height, at best. They also developed a geometrical model the results of which were in good agreement with experimentally observed errors from a sounding balloon and from aircraft tracks. Koshack et al. (2004) also addressed the problem of location accuracy of the LMA by developing a source retrieval algorithm for theoretically studying the location errors. More recently, Chmielewski and Bruning (2016) have explored location errors and detection efficiency of various LMA networks in the United States by means of model simulations based on methods previously developed by Koshack et al. (2004) and Thomas et al. (2004).

The geometric model of Thomas et al. (2004) is thus a good tool for evaluating the SAETTA network performances. It provides analytical formulations of the increase in the sources location uncertainties with distance, based on the spherical coordinates  $(r, \theta, \varphi)$  of a VHF source relative to the center of the network. For example, the azimuth angle  $\varphi$  is determined primarily by stations having the greatest separation transverse to the propagation line of the signal emitted by the sources. Therefore, the more extended the network is in any direction, the better the determination of the azimuth angle  $\varphi$ . Given the larger extension of SAETTA network in the South-North direction, azimuth angles are therefore expected to be better determined in the West-East direction. This is confirmed by the errors calculated with the geometrical model, for VHF sources at 10 km of altitude seen from 12 stations, and displayed in Fig. 3. The azimuthal errors, which correspond to the central graphs, exhibit lower values in the West-East direction. Furthermore, the comparison between the 2014-2015 network and the 2016 network configurations confirms that the larger the South to North extension of the network, the lower the errors are in the West-East direction. The same behavior can be pointed out from Fig. 3 for the range error since it also depends on the transverse extent according to Thomas et al (2004).

The geometrical model also predicts that the slant range  $r$  and altitude  $z$  uncertainties increase versus  $r^2$  while the azimuth uncertainty more slowly increases versus  $r$ . This behavior is illustrated in Fig. 3: far from the network, the geographical error gradient is much higher for range and altitude determination (left and right graphs, respectively) compared to the relatively small geographical error gradient of azimuth determination (central graphs). The azimuth is best determined and the corresponding errors are the smallest. Looking into detail of Fig. 3 for the 2016 network, the theoretical errors can be evaluated, for example, about 50 km from the center of the network and compared with that of the STEPS network according to Fig. 12 of Thomas et al. (2004). According to Fig. 3, the radial, azimuthal, and altitude errors at 50 km from the center of the SAETTA network are about 15 m, 8 m, and 40 m, respectively. According to Fig. 12 of Thomas et al., the radial,

*(z is derived from  $\text{rad } \theta$ )*

*10-km*

*(Should connect about 1-3 km, too)*



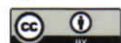

azimuthal, and altitude errors at 50 km from the center of the STEPS network are about 100 m, 16 m, and 80 m, respectively (these values are the average values of the errors in both East-West and North-South directions, i. e. black and red solid lines at the abscissa 50 km). The comparison shows that theoretical errors seem less important for the SAETTA network, especially for the slant range  $r$ . The greater horizontal extension  $D$  of the SAETTA network is undoubtedly at the origin of this behavior since the theoretical errors are inversely proportional to  $D$  according to Thomas et al (2004), and even inversely proportional to the square of  $D$  for the radial error.

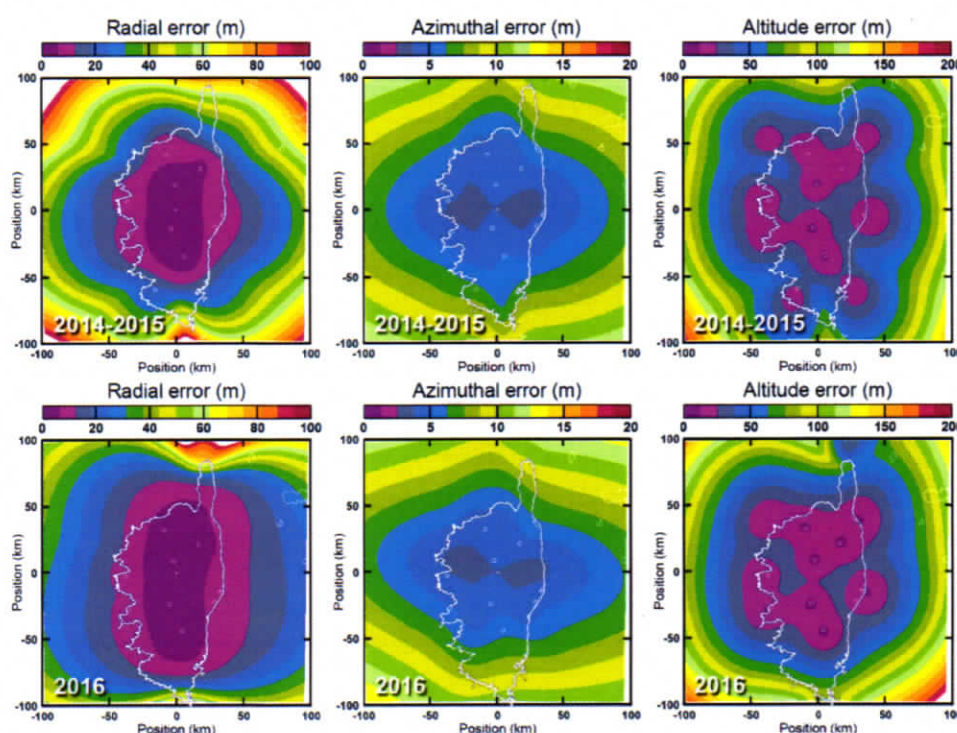

Figure 3: Radial, azimuthal and altitude errors computed with the geometrical model of Thomas et al. (2014) for VHF sources at 10 km of altitude seen from 12 stations. Top: initial SAETTA network in 2014 and 2015; bottom: new SAETTA network since 2016. Stations location is indicated by white squares.

The SAETTA network possesses a significant vertical baseline that allows overcoming the insufficient vertical separation among the stations that can be source of error in the determination of the VHF sources altitude via the elevation angle  $\theta$ , especially for distant sources (Thomas et al, 2004; Koshak et al., 2004). In order to evaluate the contribution of this vertical baseline to the localization accuracy of VHF sources, the calculation of the altitude error was first carried out for the SAETTA 2016 network over a wide domain (300 km  $\times$  300 km), and in a second time for the same network but considered

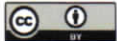

flat with all the stations located at the same average altitude of 863 m. Displayed in Fig. 4, the results confirm the above expectation for distant sources. Within a radius of about 150 km from the center of the network, the altitude errors are quite similar for both network configurations (actual and flat networks). The main differences arise in regions beyond this radius, where the altitude error strongly increases for a flat network. Therefore, the vertical baseline due to having some stations at higher altitudes improves the accuracy for lightning detection over the mainland of Italy and France.

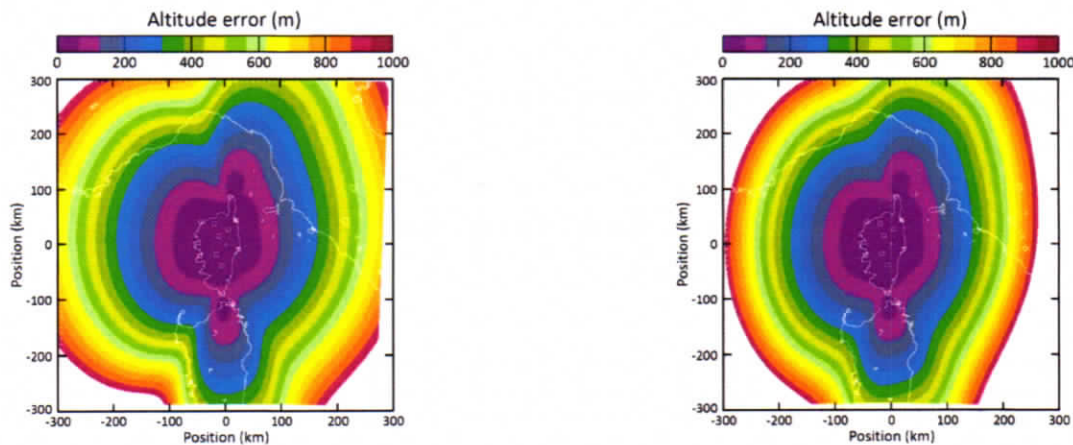

Figure 4: Altitude error computed with the geometrical model of Thomas et al. (2014) for VHF sources at 10 km of altitude seen from 12 stations in a large domain: analysis for the 2016 network (left) and for the same network considered flat with an average altitude of about 863 m (right).

### 3 Overall observation from 2014 to 2016

#### 3.1 Typical lightning observation

SAETTA is able to detect flash activity up to approximately 350 km from the center of the network (Pinerole station). An example of this large scale detection is displayed in Fig. 5 as VHF sources density for the 28 June 2017 event. The left graph correspond to unfiltered data. One can see on the vertical projections (center left and bottom right frames) that lower layers are poorly and even not documented far from the network because of the Earth roundness, as it is with meteorological radars. Unfortunately, locally generated noise events can lie close in time to lightning events and therefore be considered in the calculation of VHF sources position, producing slightly fuzzy lightning contours. The best way to minimize their impact on observations is to restrict the sources to those located by more than 6 stations with a lower goodness of fit (i. e. reduced chi-square, see Thomas et al., 2004). The right graph in Fig. 5 corresponds to such filtered data: the VHF sources have been determined with a minimum of 7 stations and with a reduced-chi square  $\chi^2 \leq 0.5$ . Those values were determined empirically

*Bruff  
describes the various panels, and  
say that this is the conventional XLM-A format.*

*why Stéphane?  
with as few as 4 sensors??  
(minimally filtered data  
(min. 6 stations &  
 $\chi^2 \leq 5$ )*



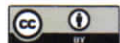

for SAETTA based on several observations at different time and space scales. By comparing the geographical projections (bottom left frames) of left and right graphs in Fig. 5, one can see that the highest densities remain almost not affected by the filtering. The same behavior is visible at lightning scale (not shown here) where discharge channels remain very well described and noisy sources are eliminated after filtering. From there, all the results presented below will relate to VHF sources determined with this filtering.

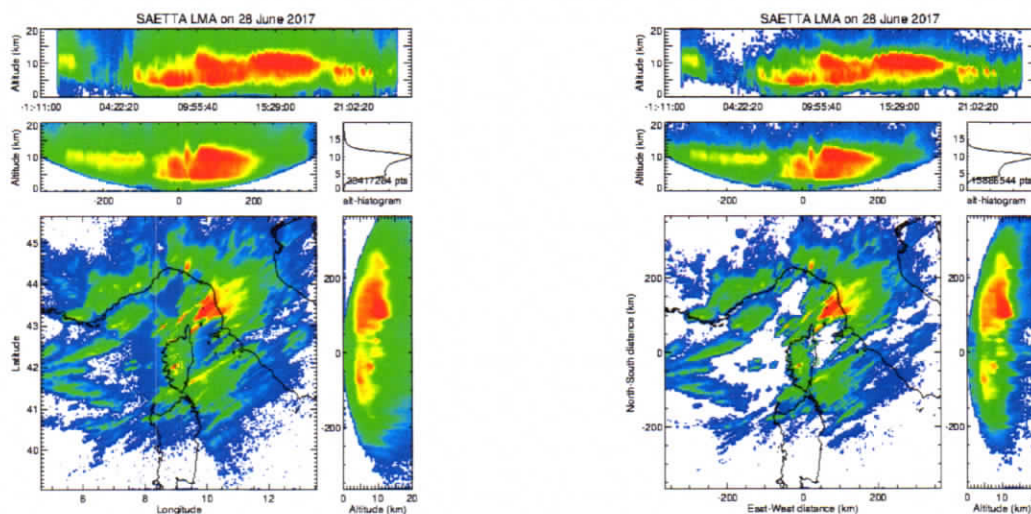

Figure 5: VHF sources detected by SAETTA during the storm event of 28 June 2017. Left: sources density of unfiltered data with angular projection (minimum of 6 stations,  $\chi^2 < 5$ ). Right: sources density of filtered data with Cartesian coordinate projection on the same domain (minimum of 7 stations,  $\chi^2 < 0.5$ ). Composition of each graph: altitude vs. time (top); altitude vs. longitude or view from the South (center left); VHF sources altitude histogram (center right); latitude vs. longitude or geographical projection (bottom left); altitude vs. latitude or view from the West (bottom right).

Another example of SAETTA detection is displayed in Fig. 6. Here the observation is made at the lightning scale during about 1 second. The left graph represents a Cloud-to-Ground (CG) lightning. When looking to the top frame (altitude of VHF sources versus time), one can easily see that the initial phase of the discharge (beginning of the time sequence in blue color) consists of a descending negative leader that starts at about 6 km high just before 14:47:43.2 and descends to about 3.6 km. Its propagation speed is roughly evaluated at  $3 \times 10^5 \text{ m s}^{-1}$ . It is followed by four other leaders propagating towards the ground between 14:47:43.2 and 14:47:43.4. The polarity of the leaders is deduced from the power with which the VHF sources are detected since intermittent negative leaders radiate much more than continuous positive leaders. The 3<sup>rd</sup> and 4<sup>th</sup> leaders seem to have reached the ground since VHF sources were detected at very low altitude few milliseconds after their triggering. Afterward a positive leader propagates almost horizontally over about 15 km in the trailing stratiform region of

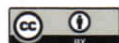

the cloud according to the bottom left frame until 17:47:44.2 when a negative leader suddenly propagates upward to the upper part of the cloud and spreads over about 40 km. In the mean time, a positive leader subsequently appears to develop in the lower layer at about 4.5 km high.

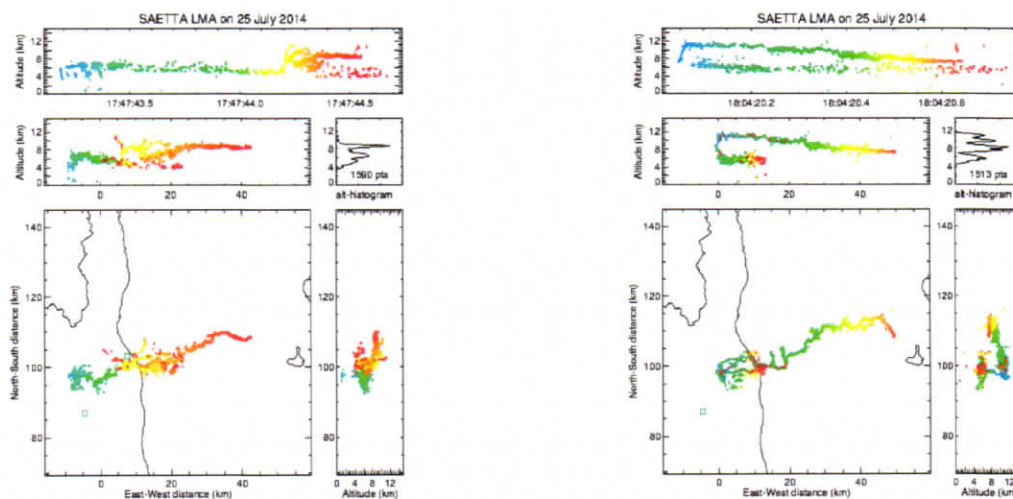

5

Figure 6: Examples of CG (left) and IC (right) lightning detected by SAETTA on 25 July 2014. Each dot corresponds to a VHF source detected by SAETTA. The colors indicate the time during the sequence: from blue (beginning of the time window) to red (end of the time window). Stations location is indicated by green squares. Composition of each graph: same as in Fig. 5.

The right graph in Fig. 6 represents an Intra-Cloud (IC) lightning. The corresponding top frame shows that the initial phase of the discharge corresponds to an ascending leader triggered at about 7 km high and propagating up to about 11 km. Then it propagates over approximately 55 km following a slow descent, which is most probably due to the sedimentation of the charged ice particles that have been transported in the stratiform region and on which the discharge connects (Carey et al., 2005; Ely et al., 2008). In the end of the time sequence (red color) a fast ascending discharge (recoil leader) follows the main vertical branching of the flash then propagates almost horizontally in the upper part of the initial negative leader path (spaced red dots in the center left vertical projection).

### 3.2 Short lightning climatology over Corsica

In order to assess the climatology of convection over Corsica, which is expected to be representative of the convection in the Western Mediterranean basin, overall data for each year of observation are stacked with previous ones. The data analysis focuses on the 240 km × 240 km domain of better detection accuracy centered on Corsica and on filtered data (VHF sources



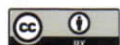

determined with a minimum of 7 stations and with a reduced-chi square  $\chi^2 \leq 0.5$ ). At the present time the data processing and analysis of 3 years of observation have been completed (2014; 2015; 2016). It is far from representing a sufficient sample to call this climatology but it gives the first tendencies of the stormy behavior in this region.

*cannot see this for Fig 7 (Top left)*

*base for log scale 2, 10, e?*

5 The overall cumulative number of filtered VHF sources is displayed in Figure 7 (top left). The VHF sources are counted on 1 km × 1 km pixels. The highest values (dark red and red colors) are located above the main relief of the island of Corsica, and more specifically in the center of the northern part at the crossroads of 3 large valleys, roughly between the Pinerole and Compoli stations (see Fig. 1). Other high values are located above the sea near the east coast, and also west of Cape Corse (long relief oriented South-North and forming the northern tip of Corsica). One can distinguish specific signatures of aircraft trajectories especially that on the west side of Corsica. This trajectory passes by the position of the station Tavera and extends in the direction West South-West just to the south of the station Calcatoggio (see Fig. 1). This kind of signature is expected to disappear in future years with the accumulation of data but also on a frequency map since it appears only one time.

*plural*

*"storm day"*

*does not seem logical for 3 years? Problem - more than 1 km pixel*

*? > 1000 sources km<sup>2</sup> (?)*

15 We built such a frequency map by counting the number of days with at least 5 VHF sources that appear in a given 1 km × 1 km pixel. This value of 5 sources has been tested and chosen so as not to take into account isolated sources corresponding to residual noise or poorly located sources, while keeping the events with low lightning activity. It is a compromise that respects the storm activity actually observed. The overall frequency of storm days for 2014 to 2016 years is displayed in Fig. 7 (top right). The high values patterns are somewhat different from that of the cumulative number of VHF sources. A big maximum (dark red, 10 km south of Compoli station) appears in the northern part of the island few kilometers to the east of the maximum of VHF sources displayed in Fig. 7 (top left). Secondary maxima (orange and yellow) are located over the central main relief; over a small area close to the Biguglia station (see Fig. 1); and over the sea in the north-east quarter of the domain. The high values of VHF sources number (Fig. 7 on the top left) corresponding to low frequencies (Fig. 7 on the top right) are obviously the signature of very intense events, e. g. almost everywhere over the sea where red color is displayed in the top left graph of Fig. 7.

*must be in a small (~ 5x5 km) region*

*could be an artifact*

*don't know it is in the center though*

*the 3 don't know, due to... some noise & random cases w/ the other 4 other sensors*

30 By comparing the 2 graphs at the top of Fig. 7, one realizes that the north center perimeter encompassing the crossroads of the 3 main valleys and the relief south of the Compoli station seems to be a place where thunderstorms are together very active and often present. The question that comes naturally to mind is when does it happen and why does it happen in this place? To answer to the first point, the study of the frequency of the events was differentiated on the one hand between night and day and on the other hand according to the month of the year. The frequency of stormy day during night between 18h and 6h UT is displayed in Fig. 7 (bottom left) and that during day between 6h and 18h UT in Fig. 7 (bottom right), both with the same color scale as the overall frequency (Fig. 7, top right). It is clear that night is much less affected by convection and when it is, it occurs rather over the sea meanwhile day lightning activity provides the main contribution to the overall

*Link to... location & light for the unique days*

*origin source or noise in other regions!*



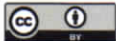

frequency pattern. A more precise study of the diurnal evolution of the lightning activity was carried out for the observation of July only. The results not presented here show that the maximum activity is due to storm events occurring between 11:00 UT and 14:00 UT. As expected, the maximum of lightning frequency over the relief of Corsica is thus mainly due to diurnal convection.

5

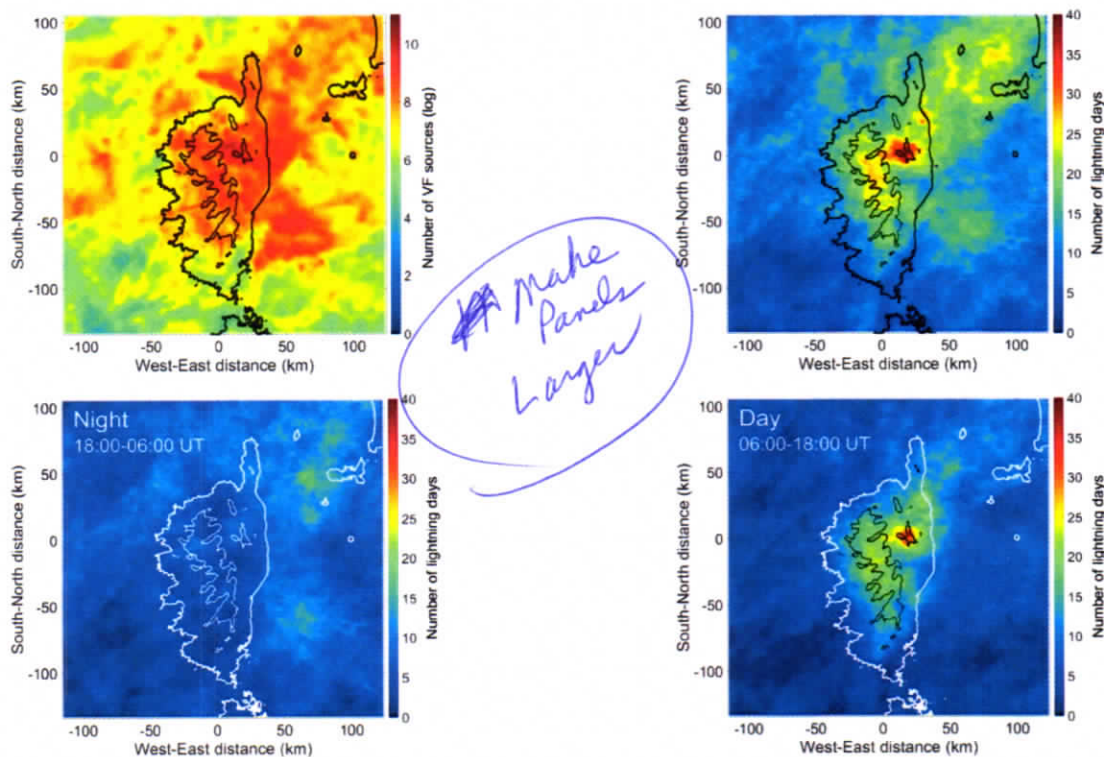

Figure 7: Overall cumulative number of filtered VHF sources in the 240 km × 240 km domain of better detection accuracy centered on Corsica for 2014 to 2016 years (top left); frequency of stormy days for the overall set of filtered data on the same domain and during the same period (top right); frequency of stormy days at night (bottom left) and day (bottom right).  
 A stormy day in a given pixel is defined as a day during which at least 5 VHF sources are detected in that pixel. Isocontours at 1000 m altitude are indicated by black or white lines inside Corsica.

10

The differentiation of the storm frequency according to the month of the year is displayed in Fig. 8 from June to September (most active months). June is characterized by a maximum of lightning activity over the whole relief, and especially in the center of the island and just south of Compoli station. In July the most frequent lightning activity concentrates over the northern half of the island, with a main maximum close to the crossroads of the 3 main valleys over a secondary relief south west of Compoli station, and a secondary maximum in the north-east quarter of the domain in the Gulf of Genoa. In August,

15



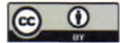

the lightning activity becomes scarce with a maximum located close to the east coast in the vicinity of the Biguglia station (see Fig. 1) and with again a secondary maximum in the Gulf of Genoa. At last in September the maximum lightning activity is located over the sea 20–40 kilometers east of Cap Corse, while secondary maxima are present on the west flank of southeast main relief and close to the southeast coast. The maximum of stormy day frequency observed in Fig. 7 is thus

5 mainly due to July and in some extent to June lightning activities.

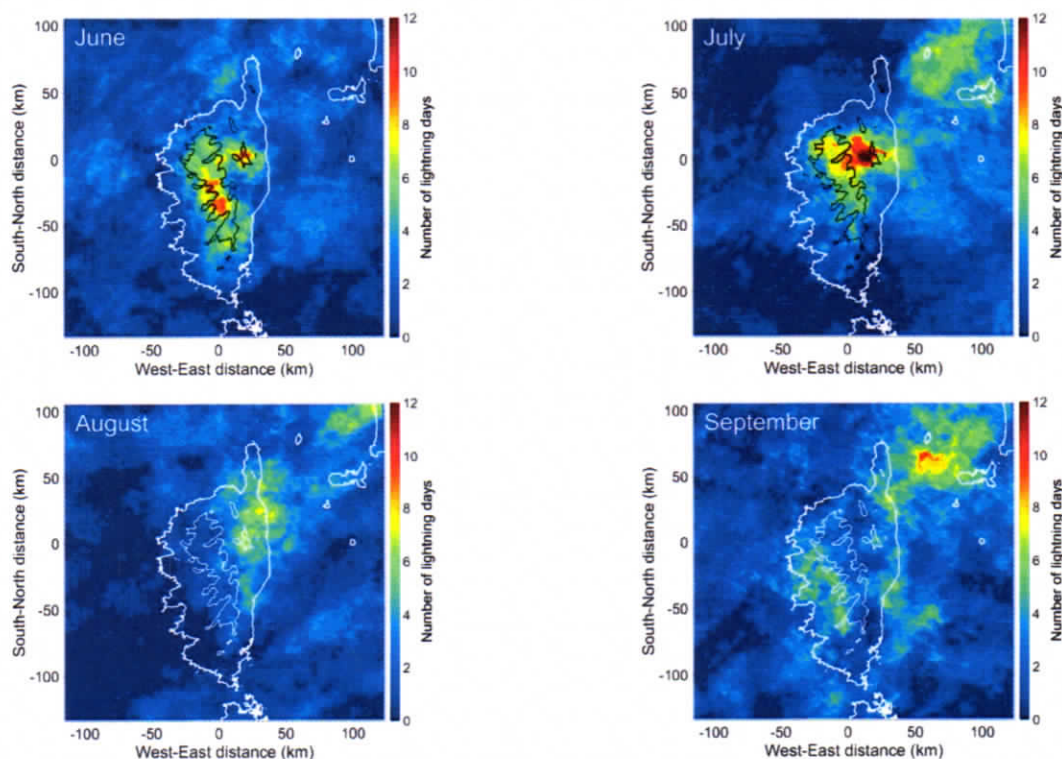

Figure 8: Maps of monthly number of stormy days in the  $240 \text{ km} \times 240 \text{ km}$  domain of better detection accuracy centered on Corsica from June to September for 2014 to 2016 years. Isocontours at 1000 m altitude are indicated by black or white lines inside Corsica.

To complete these geographical observations, one can also look at the overall observations reported as a histogram in Fig. 9. This figure shows the number of stormy days on the domain of better detection accuracy for each month and each year, together with the monthly average number of stormy days. The whole available data set is here enriched with 2017 data (easy to extract). The graph exhibits 2 maxima in July and in September, and a minimum in August (winter is disregarded). From May to August the number of stormy days seems to follow the elevation of the Sun in the sky, i. e. convection is controlled by the flow of solar energy. While from September, the number of stormy days increases significantly on the

do you mean to say that at this time, the complete 2017 dataset is ~~has not~~ <sup>has not</sup> been processed, so 2017 storm days are ~~not~~ <sup>derived</sup> from the ~~dataset~~ <sup>dataset</sup>?

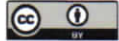

domain. The corresponding events can either be numerous small storms over the sea or over the relief (Barthlott et al., 2014), or high precipitation events such as those occurring in South of France or in Corsica (Ducrocq et al., 2008; Lambert and Argence, 2008; Nuissier et al., 2011; Ducrocq et al., 2013; Scheffknecht et al., 2016), which are formed under the influence of synoptic flows that interact with the relief of Corsica through low level water vapor fluxes (Adler et al., 2015). The key ingredients that control their development are orographic forcing, low level convergence, strong moisture fluxes and conditionally unstable flow (Ducrocq et al., 2008). Furthermore during the autumn season the sea surface is still warm and constitutes a pool of water vapor and energy meanwhile upper level cold air begin to progress from the North, associated with low geopotential in the region.

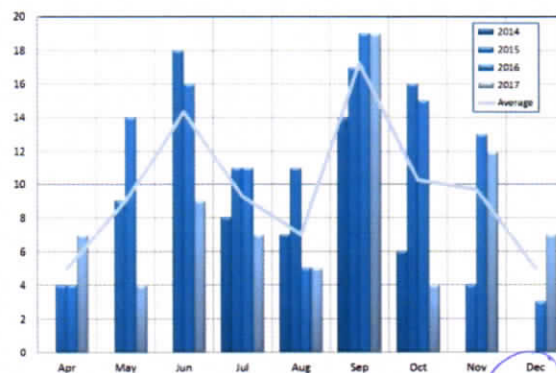

Figure 9: Monthly number of stormy days in the 240 km × 240 km domain of better detection accuracy centered on Corsica for 2014 to 2017 years.

In July the number of stormy days is not the highest (Fig. 9), but since thunderstorms often occur in the same micro-region, the frequency of thunderstorms per pixel in this zone is the highest (Fig. 8). If we add the fact that the number of stormy days in July is particularly homogeneous from year to year (between 7 and 11 over 4 years in Fig. 9), it seems that this area is the seat of very specific and reproducible processes that lead to this maximum frequency of thunderstorm days in this location in July between 11:00 UT and 14:00 UT.

So to answer the second point of the question asked before, one has to analyze the processes involved in convection in July between 11:00 UT and 14:00 UT in the center of the northern part of Corsica. This work is currently being carried out by means of high resolution numerical simulations and will be the subject of a forthcoming paper. The first results (Tidiga et al., 2018) show that the convection follows the setting up of sea breezes which are then channeled through the 3 main valleys, which leads to a strong convergence of low-level moisture flows in the convection trigger zone. This result is to be compared with the influence of valley and slope breezes as suggested by Barthlott and Kirshbaum (2013).



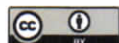

#### 4 Specific events report: high altitude discharges

We report hereafter specific events that were detected by SAETTA in 2015. They concern high altitude discharges in the convective core and in the trailing stratiform region of several thunderstorms. Such events raise open questions about the conditions for the triggering of cloud discharges and for thunderstorm electrification.

From 7 to 10 June 2015, Corsica Island underwent 4 consecutive days of intense, stationary, and long-lasting diurnal convection over most part of the relief with lightning activity characterized by highest VHF sources between 12 km and 13 km high. The 7 June event lasted 05:50 (from 09:40 UT to 15:30 UT) and exhibited high altitude discharges on top of convective core and 1 high altitude discharge in the trailing stratiform region (15:26:15 UT). The 8 June event lasted 03:50 from 10:10 UT to 14:00 UT and exhibited high altitude discharges on top of convective core and 6 high altitude discharges in the stratiform region (12:38:39; 12:43:02; 12:54:05; 12:59:20; 13:21:43; 13:57:18 UT). The June 9 event lasted 06:30 from 09:10 UT to 15:40 UT and exhibited high altitude discharges on top of convective core and 1 high altitude discharge in the stratiform region (11:58:38 UT). The June 10 event lasted 04:20 from 10:00 UT to 14:20 UT but did not exhibit any specific high altitude discharges.

##### 4.1 Event of 8 June 2015: convective surges

Let us focus on 8 June event which presents more specific discharges at high altitude than the other similar events. The environmental wind pattern is constituted of sea and slope breezes on the ground, with a slight north wind appearing around the 700 hPa level, and strengthening as it turns from north-east at higher levels. The cumulative VHF sources density is displayed in Fig. 10. The mesoscale convective system is constituted of 3 main convective cores embedded in a southward trailing stratiform region. The first convective core appears further south at the beginning of the event and lasts about 50 minutes from about 11:12 UT to 12:03 UT. It is centered on the point of coordinates  $x = 27$  km and  $y = 57$  km and exhibits 2 main layers of strong VHF sources densities located at altitudes of about 6 and 10 km. The analysis of the power with which the VHF sources are detected shows that this core and the event as a whole are of regular polarity, i.e. with upper positive charge and lower negative charge associated with those 2 layers of strong VHF sources densities. The 2 other main convective cores centered on points of coordinates  $x = -16$  km and  $y = 75$  km for the most easterly one, and  $x = -16$  km and  $y = 75$  km for most westerly one, start at 11:44 UT and 11:52 UT, respectively, and last until about 13:00 UT by interacting. At the end of the period they are fed on the north side by a line of zonally oriented smaller cells. This organization is quite usual for a mesoscale convective system as described by Stolzenburg and Marshal (2008) in their review about thunderstorms structures.

The event is characterized by 6 convective surges (see Table 2); all are associated with the northeast main convective core that is located the most windward and that undoubtedly benefits from richer low-level moist fluxes making it more vigorous.

see fig 5 - June 28, 2017

add lit. distribute to the chemistry?

does not seem so high, but this is possible quite high for this route

Compressed

not clear what you mean here "from" "Towards"?

Radars or Sat image? Since no convective

OK

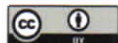

*These surges*  
 They all have about the same characteristics as the most intense of them (# 5), the VHF sources of which are displayed in Fig. 11 versus altitude (left) and power of detection (right). These sources are located in a small perimeter of approximately 5 km by 5 km (red dots in the left panels of Fig. 11 dedicated to vertical projections) and are present up to 14 km altitude, while the surrounding VHF sources do not exceed 11.5 km altitude. The analysis of the power with which they are detected (Fig. 11 right) shows that the discharges are weakly radiating therefore they correspond to positive discharges, i.e. they propagate in a negative charge layer. This observation is in agreement with the conceptual model of Stolzenburg et al. (1998) and supports their idea that the upper negative charge layer is the typical uppermost charge region in MCS convection. Furthermore, the top left and top right panels in Fig. 11 (i.e. the altitude versus time windows), show that many small discharges appear quasi continuously between 10 km and 13 km altitude during this sequence. Their characteristics are markedly different from typical IC flashes because they are located in a relatively small cloud volume, they seem to trigger at very high altitude and therefore have a very limited vertical and horizontal extension.

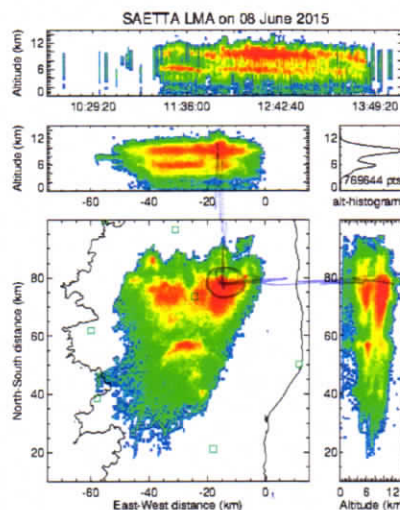

Figure 10: VHF sources density of the stormy event of 8 June 2015. Stations location is indicated by green squares.

In order to characterize the flashes produced during such convective surges in terms of flash type, triggering altitude, and flash rate, a source-to-flash clustering of lightning was carried out via the XLMA flash algorithm (Thomas et al., 2003). Several algorithms of flash classification have been developed so far (MacGorman et al., 2008, McCaul et al., 2009, Fuchs et al., 2015) but none of them is ideal, especially when the lightning rate is high and the flashes are very close to each other or overlap. The present study does not represent the truth, especially since the classification of small lightning can be affected by the filtering used (minimum number of stations or maximum  $\chi^2$ ). But considered in a qualitative way, it makes it possible to characterize the types of lightning thus defined according to the evolution of the storm event. The classification criteria are

*Time: height Panel needs to be taller & full page with (plotted separately)*

*mention XLMA as the analysis & display tool earlier in the paper.*



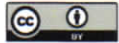

as follows: (i) big flashes (75 or more points); (ii) medium flashes (11-74 points); (iii) small flashes (10 points or less and not isolated); (iv) small-isolated flashes (2-9 points in an active region and duration larger than 1 ms); and (v) short-isolated flashes (2-9 points in an active region and duration smaller than 1 ms). The flash algorithm options (spatial and temporal parameters) are mentioned in Appendix B. The location of the 1st sources is supposed to indicate the location of initialization of the lightning.

| Convective<br>surges | Time period<br>(UT) | Position |        | Maximum<br>altitude (km) |
|----------------------|---------------------|----------|--------|--------------------------|
|                      |                     | x (km)   | y (km) |                          |
| # 1                  | 12:00 - 12:03       | -18      | 73     | 13.0                     |
| # 2                  | 12:09 - 12:13       | -15      | 72     | 12.6                     |
| # 3                  | 12:16 - 12:20       | -16      | 74     | 12.8                     |
| # 4                  | 12:26 - 12:28       | -15      | 77     | 12.6                     |
| # 5                  | 12:33 - 12:37       | -17      | 78     | 14.0                     |
| # 6                  | 12:40 - 12:43       | -23      | 78     | 12.4                     |

Table 2. Serial number, time period, position and maximum altitude of the VHF sources during the 6 convective surges.

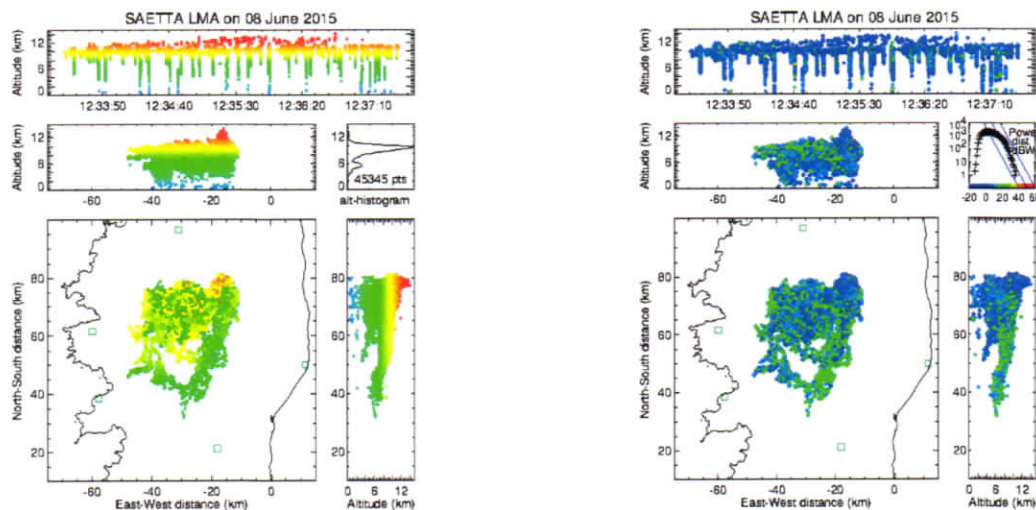

Figure 11: High altitude discharges in the convective zone during the MCS event of 8 June 2015. VHF sources displayed by dots with color scale corresponding to the altitude of the sources (left), and to the power with which they have been detected (right).
